# Supplementary material for: Saccharin Supplementation Inhibits Bacterial Growth and Reduces Experimental Colitis in Mice
Source: PubMed Central journal article supplement (PMC7230785; doi:10.3390/nu12041122), 2020-04-17
Supplement: nutrients-12-01122-s001.pdf [file nutrients-12-01122-s001.pdf]

## Supplement

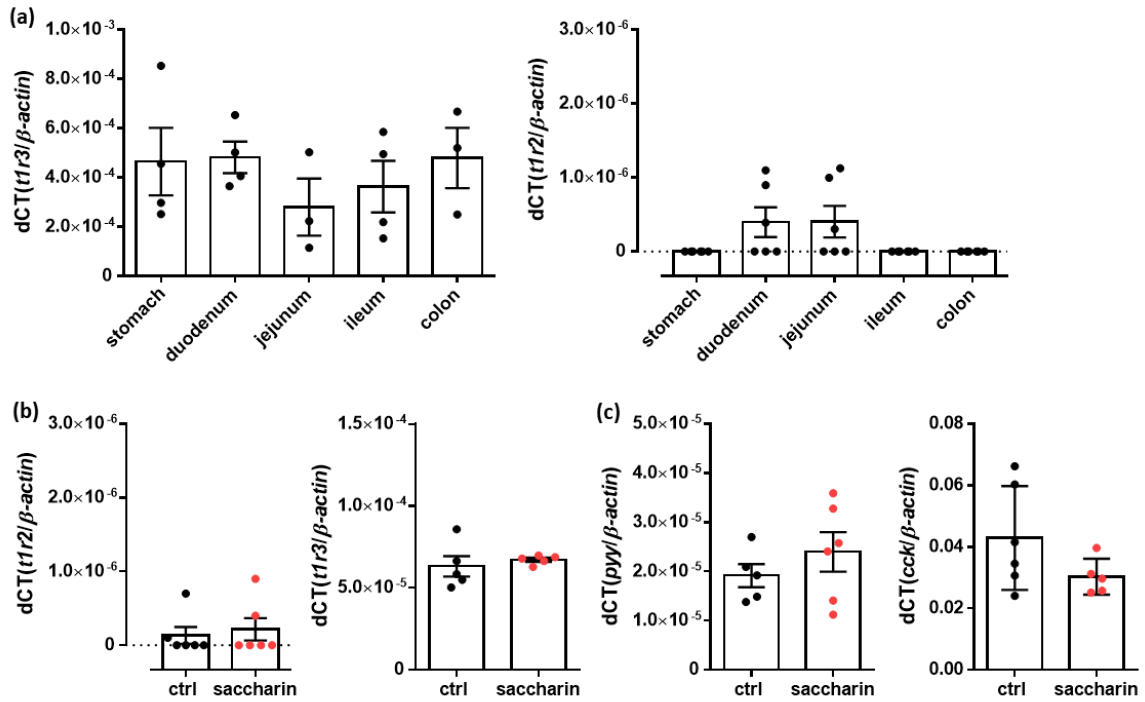

**Supplementary Figure 1:** *Tlr2* and *Tlr3* expression in the murine intestine. Expression of *Tlr3* and *Tlr2* was tested in (a) different sections of the intestinal tract and in (b) proximal jejunum section of seven days saccharin-treated and untreated mice;  $n=4$  and  $n=6$  respectively. Samples with values of zero did not show any expression beyond the detection limit. (c)  $\beta\text{-actin}$  normalized *pyy* and *cck* mRNA expression levels in biopsies from the proximal jejunum from saccharin-supplemented and ctrl mice;  $n=6$ . Values are shown as mean  $\pm$  SEM.

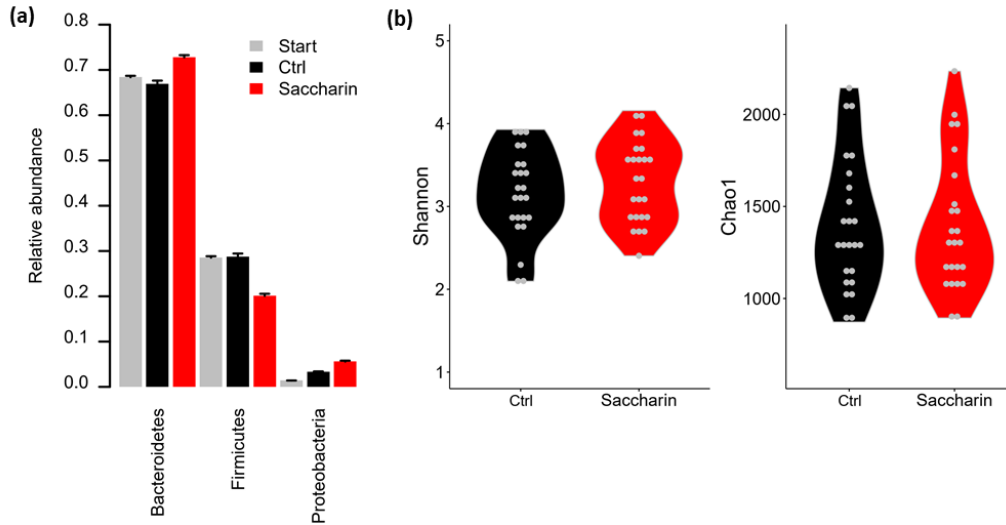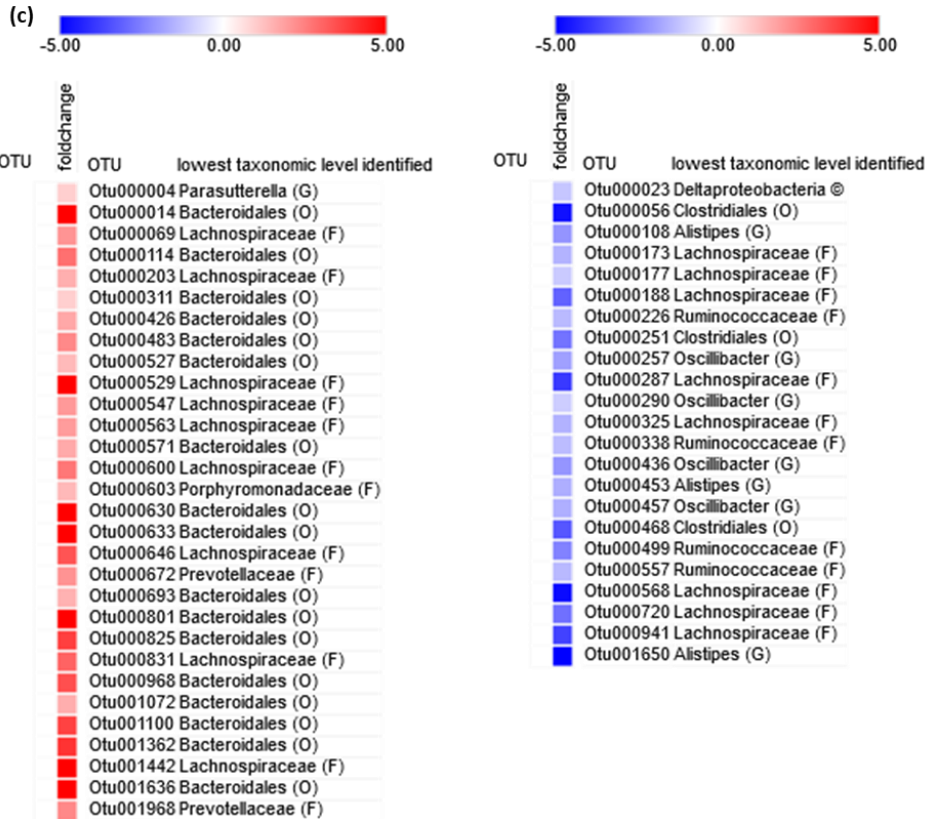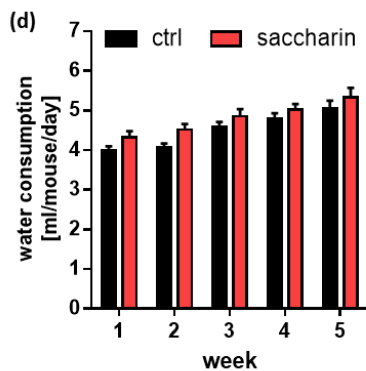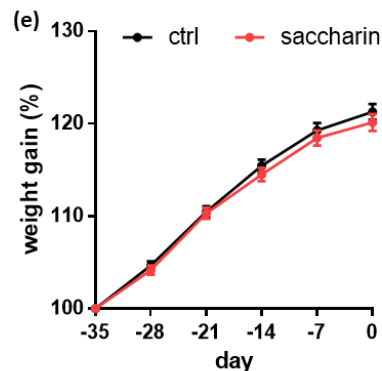

**Supplementary Figure 2:** Microbiome analysis, water consumption and weight development of saccharin supplemented or ctrl mice. **(a)** Relative abundance of phyla, **(b)** alpha diversity and **(c)** indicator species in fecal samples obtained after five weeks with or without saccharin supplementation. Heatmap was generated from indicator species analysis with the Morpheus software [48]. In red, taxa being upregulated, in blue, taxa being downregulated in saccharin-treated compared to ctrl mice. Indicator species are listed from most abundant to least abundant OTU. O, order; F, family; G, genus. Start n=48, ctrl and saccharin n=24. **(d)** Water consumption and **(e)** weight development of mice which were supplemented for five weeks with 0.1 mg/ml saccharin via the drinking water or left untreated; n=12 and n=36 from two independent experiments, respectively. **(a)**, **(d)**, and **(e)** Values are shown as mean  $\pm$  SEM. **(b)** Values are shown as violin plot.
